# Supplementary material for: Is Raman the best strategy towards the development of non-invasive continuous glucose monitoring devices for diabetes management?
Source: Frontiers journal article supplement (doi:10.3389/fchem.2022.994272), 2022-09-26
Supplement: Data_Sheet_1.pdf [file Data_Sheet_1.pdf]

## Supplementary Material

### Is Raman the best strategy towards the development of non-invasive continuous glucose monitoring devices for diabetes management?

**Biagio Todaro<sup>1,\*</sup>, Filippo Begarani<sup>3,4</sup>, Federica Sartori<sup>3,4</sup>, and Stefano Luin<sup>1,2,\*</sup>**

<sup>1</sup>NEST Laboratory, Scuola Normale Superiore, Piazza S. Silvestro 12, I-56127 Pisa, Italy

<sup>2</sup>NEST, Istituto Nanoscienze, CNR, Piazza San Silvestro 12, I-56127 Pisa, Italy

<sup>3</sup>P.B.L. SRL, Via Volta 8, I-43046, Solignano (PR), Italy

<sup>4</sup>Omnidermal Biomedics SRL, Via Volta 8, I-43046, Solignano (PR), Italy

\*Correspondence: biagio.todaro@sns.it, s.luin@sns.it

**Supplementary Table 1.** Advantages and drawbacks of techniques feasible for glycaemia sensing

| Technique                                                                | Advantages                                                                                                                                                                                                                                                                                                                                                                                  | Disadvantages                                                                                                                                                                                                                                                                                                                                                                                                                                     |
|--------------------------------------------------------------------------|---------------------------------------------------------------------------------------------------------------------------------------------------------------------------------------------------------------------------------------------------------------------------------------------------------------------------------------------------------------------------------------------|---------------------------------------------------------------------------------------------------------------------------------------------------------------------------------------------------------------------------------------------------------------------------------------------------------------------------------------------------------------------------------------------------------------------------------------------------|
| <b>Near Infrared (NIR)</b><br>(Light wavelength 0.7 $\mu$ m-2.5 $\mu$ m) | <ul style="list-style-type: none"> <li>The signal intensity is directly proportional to concentration of the analyte (glucose)</li> <li>Water transparent band in the NIR region</li> <li>Relatively low-cost materials needed</li> <li>Method also works in presence of interfering substances, such as plastic or glass</li> <li>High sensitivity of photoconductive detectors</li> </ul> | <ul style="list-style-type: none"> <li>Glucose concentration is too low for accurate detection so complex machine learning model is required for interpretation</li> <li>High scattering level</li> <li>Problems of selectivity for separation of glucose from other physiological substances and tissue components (water, haemoglobin, proteins, fat, etc.).</li> <li>Weak sensitivity and stability</li> <li>Frequent recalibration</li> </ul> |
| <b>Mid InfraRed (MIR)</b><br>(Light wavelength 2.5 $\mu$ m-25 $\mu$ m)   | <ul style="list-style-type: none"> <li>Lower scattering and higher absorption compared to NIR</li> <li>The signals are more specific and better delineated</li> <li>Glucose can absorb specific MIR wavelengths, thus its concentration can be measured with more accuracy</li> <li>Possibility to be combined with the measurement of thermal Infrared radiation</li> </ul>                | <ul style="list-style-type: none"> <li>The light has limited penetration in tissue (few micrometres) so only (diffuse) reflection may be feasible</li> <li>Strong haemoglobin and blood water absorption that interferes with measurement</li> <li>Expensive equipment</li> </ul>                                                                                                                                                                 |
| <b>Far InfraRed (FIR)</b><br>(Light wavelength 25 $\mu$ m-1000 $\mu$ m)  | <ul style="list-style-type: none"> <li>Frequent calibration is not required</li> <li>Less sensitive towards scattering than NIR and MIR</li> </ul>                                                                                                                                                                                                                                          | <ul style="list-style-type: none"> <li>The emission radiation intensity depends on temperature and substance thickness</li> <li>Strong water absorption makes extremely difficult the identification of other analytes, such as glucose, in the sample</li> </ul>                                                                                                                                                                                 |

| Technique                                                                    | Advantages                                                                                                                                                                                                                                                                                                                                    | Disadvantages                                                                                                                                                                                                                                                                                                 |
|------------------------------------------------------------------------------|-----------------------------------------------------------------------------------------------------------------------------------------------------------------------------------------------------------------------------------------------------------------------------------------------------------------------------------------------|---------------------------------------------------------------------------------------------------------------------------------------------------------------------------------------------------------------------------------------------------------------------------------------------------------------|
| <b>Time of Flight (TOF) and Terahertz Time-Domain Spectroscopy (THz-TDS)</b> | <ul style="list-style-type: none"> <li>• Strong absorption and dispersion for glucose molecule</li> <li>• Immune to background noise</li> <li>• Study of a broad frequency range with a single ultrashort pulse</li> <li>• Complex permittivity measurement with a single scan</li> </ul>                                                     | <ul style="list-style-type: none"> <li>• Long measurement time</li> <li>• Low spatial and depth resolution</li> <li>• Expensive and difficult to miniaturize equipment</li> </ul>                                                                                                                             |
| <b>Raman Spectroscopy (RS)</b>                                               | <ul style="list-style-type: none"> <li>• Chemical stability</li> <li>• Minimally sensitive towards temperature changes and water presence</li> <li>• High specificity</li> <li>• Good penetration depth with NIR sources</li> <li>• Suitable on any substrate (including opaque ones) since it measures scattered light</li> </ul>            | <ul style="list-style-type: none"> <li>• The laser radiation can be dangerous during CGM</li> <li>• Unstable laser wavelength and intensity</li> <li>• Long collection time</li> <li>• Low SNR: method is susceptible to noise arising from fluorescence (or possibly Raman) from other molecules.</li> </ul> |
| <b>Surface-enhanced Raman scattering (SERS)</b>                              | <ul style="list-style-type: none"> <li>• High sensitivity, selectivity and specificity</li> <li>• User-friendly approach (for sensor patches)</li> </ul>                                                                                                                                                                                      | <ul style="list-style-type: none"> <li>• Subcutaneous injection of metal materials can produce toxicity and skin damages</li> <li>• Typically expensive tools</li> </ul>                                                                                                                                      |
| <b>Millimetre and Microwave sensing (MMS)</b>                                | <ul style="list-style-type: none"> <li>• Deep penetration of signal</li> <li>• No risk for ionization</li> <li>• Highly sensitive for glucose detection</li> </ul>                                                                                                                                                                            | <ul style="list-style-type: none"> <li>• Poor selectivity</li> <li>• Very much sensitive to physiological parameters such as sweating, breathing and cardiac activity</li> </ul>                                                                                                                              |
| <b>Photoacoustic Spectroscopy (PAS)</b>                                      | <ul style="list-style-type: none"> <li>• Relatively simple and compact sensor design</li> <li>• Used optical radiation (wavelength from the ultraviolet to the MIR ranges) isn't harmful to skin</li> <li>• Not susceptible to water, NaCl, cholesterol and albumin</li> <li>• PA signal is not influenced by scattering particles</li> </ul> | <ul style="list-style-type: none"> <li>• Signal is susceptible to temperature, motion, pulsation and surrounding acoustic noise, so low SNR</li> <li>• Long integration time.</li> </ul>                                                                                                                      |
| <b>Enzymatic detection technology (EDT)</b>                                  | <ul style="list-style-type: none"> <li>• Direct and efficient collection in situ</li> </ul>                                                                                                                                                                                                                                                   | <ul style="list-style-type: none"> <li>• Minimally invasive</li> <li>• Under development technology</li> </ul>                                                                                                                                                                                                |

| Technique                                | Advantages                                                                                                                                                                                                                                                                                                                                                                                                                                                                                                                                                               | Disadvantages                                                                                                                                                                                                                                                                                                                                                                                                                                                                                                                                |
|------------------------------------------|--------------------------------------------------------------------------------------------------------------------------------------------------------------------------------------------------------------------------------------------------------------------------------------------------------------------------------------------------------------------------------------------------------------------------------------------------------------------------------------------------------------------------------------------------------------------------|----------------------------------------------------------------------------------------------------------------------------------------------------------------------------------------------------------------------------------------------------------------------------------------------------------------------------------------------------------------------------------------------------------------------------------------------------------------------------------------------------------------------------------------------|
| <b>Reverse iontophoresis (RI)</b>        | <ul style="list-style-type: none"> <li>Electrodes are not difficult to manufacture and be applied to the skin with minimum training.</li> <li>Good correlation between glucose level in the ISF and in the blood under stable conditions.</li> <li>Glucose measurement is based on the well-known enzymatic method.</li> </ul>                                                                                                                                                                                                                                           | <ul style="list-style-type: none"> <li>Skin irritation due to the passage of current.</li> <li>Susceptible to sweating.</li> <li>Rapid changes of glucose concentration cannot be detected accurately</li> </ul>                                                                                                                                                                                                                                                                                                                             |
| <b>Sonophoresis Technology (ST)</b>      | <ul style="list-style-type: none"> <li>User-friendly approach as there is little side-effect to skin</li> <li>Glucose measurement is based on well-known enzymatic method</li> <li>Good control on the amount of glucose that can be extracted for the analysis</li> </ul>                                                                                                                                                                                                                                                                                               | <ul style="list-style-type: none"> <li>Susceptible to temperature and pressure variations, to environmental parameters, and to the presence of other compounds</li> </ul>                                                                                                                                                                                                                                                                                                                                                                    |
| <b>Fluorescence Technology (FT)</b>      | <ul style="list-style-type: none"> <li>Highly sensitive (glucose concentration as small as 25 <math>\mu</math>M), allowing even single-molecule detection</li> <li>High specificity because of distinctive optical properties of molecules</li> <li>It can measure analyte concentration in terms of fluorescence intensity and decay times</li> <li>Fluorescence lifetime can be precisely measured in scattering media such as skin layers, indicating that fluorescence technology is suitable for glucose monitoring devices based on transdermal sensing</li> </ul> | <ul style="list-style-type: none"> <li>Needs an “exogenous” fluorescence-based sensor/indicator in contact with the analyte</li> <li>Depending on the sensor, can be sensitive to local pH changes and/or oxygen levels</li> <li>Biocompatibility issues due to local tissue trauma</li> <li>Potential toxicity issues due to foreign body in biological media</li> <li>Short lifespan of the fluorophore: limitations associated with photostability and loss of recognition capability</li> <li>Susceptible to autofluorescence</li> </ul> |
| <b>Metabolic Heat Conformation (MHC)</b> | <ul style="list-style-type: none"> <li>Physiological parameters for glucose prediction are relatively easy to measure using well established technologies</li> </ul>                                                                                                                                                                                                                                                                                                                                                                                                     | <ul style="list-style-type: none"> <li>Indirect quantification of glucose; needs personalized calibration</li> <li>Sensitive towards variation in temperature, sweat, other physio-pathological conditions</li> </ul>                                                                                                                                                                                                                                                                                                                        |
| <b>Bioimpedance spectroscopy (BS)</b>    | <ul style="list-style-type: none"> <li>Cheap method</li> <li>Suitable for CGM</li> <li>Easy measurement on the skin</li> </ul>                                                                                                                                                                                                                                                                                                                                                                                                                                           | <ul style="list-style-type: none"> <li>Sensitive to variations of temperature and motion, to sweat and to water content</li> <li>Low specificity to glucose</li> <li>Require long calibration periods</li> </ul>                                                                                                                                                                                                                                                                                                                             |

| Technique                                   | Advantages                                                                                                                                                                                                                                                                                                                                     | Disadvantages                                                                                                                                                                                                                                                                                                                                                                |
|---------------------------------------------|------------------------------------------------------------------------------------------------------------------------------------------------------------------------------------------------------------------------------------------------------------------------------------------------------------------------------------------------|------------------------------------------------------------------------------------------------------------------------------------------------------------------------------------------------------------------------------------------------------------------------------------------------------------------------------------------------------------------------------|
| <b>Optical Coherence Tomography (OCT)</b>   | <ul style="list-style-type: none"> <li>• High resolution and good SNR</li> <li>• Not susceptible to blood pressure, haematocrit and cardiac activity</li> <li>• High penetration depth</li> </ul>                                                                                                                                              | <ul style="list-style-type: none"> <li>• Sensitive to temperature changes on the skin and motion</li> <li>• Suffers from tissue inhomogeneity</li> <li>• Lack of chemical specificity</li> </ul>                                                                                                                                                                             |
| <b>Optical Polarimetry Technology (OPT)</b> | <ul style="list-style-type: none"> <li>• Optical components can be easily miniaturized</li> <li>• The laser intensity variation will not change too much the glucose prediction</li> <li>• Ease of use</li> </ul>                                                                                                                              | <ul style="list-style-type: none"> <li>• Sensitive to interference from other optically active compounds, temperature, pH changes and motion</li> <li>• Applied in the eye: lag time could be up to 30 min</li> <li>• Requirement of external laser source and proper alignment with eye</li> <li>• A non-contact method needs to be developed for commercial use</li> </ul> |
| <b>Surface Plasmon Resonance (SPR)</b>      | <ul style="list-style-type: none"> <li>• Highly sensitive for glucose molecule detection and for small changes of blood glucose concentration</li> <li>• No need for statistical calibration models due to its conventional electrical model nature</li> </ul>                                                                                 | <ul style="list-style-type: none"> <li>• Need contact to the analyte</li> <li>• Long calibration process</li> <li>• Bulky in size</li> <li>• Sensitive to temperature, sweat and motion</li> </ul>                                                                                                                                                                           |
| <b>Electromagnetic sensing (EMS)</b>        | <ul style="list-style-type: none"> <li>• Safe technology for the absence of ionization of other molecules of the body</li> <li>• Low-cost and easily miniaturized</li> </ul>                                                                                                                                                                   | <ul style="list-style-type: none"> <li>• Lack of selectivity because dielectric constant is affected by other blood components</li> <li>• Sensitive to temperature</li> </ul>                                                                                                                                                                                                |
| <b>Ultrasound Technology (UT)</b>           | <ul style="list-style-type: none"> <li>• Well established technology</li> <li>• User-friendly approach since not harmful to tissue cells</li> <li>• High sensitivity due to the long penetration below the skin and other tissues</li> <li>• Immune to skin colour variation</li> <li>• Wide range of frequencies available for use</li> </ul> | <ul style="list-style-type: none"> <li>• Limited accuracy with ultrasound, so often coupled with NIR in a multi-model approach</li> <li>• Expensive</li> <li>• Not suitable for CGM</li> <li>• Pressure changes and temperature fluctuations can cause interferences</li> </ul>                                                                                              |

| Technique                                                                   | Advantages                                                                                                                                                                                                                                                               | Disadvantages                                                                                                                                                                                                                                                                               |
|-----------------------------------------------------------------------------|--------------------------------------------------------------------------------------------------------------------------------------------------------------------------------------------------------------------------------------------------------------------------|---------------------------------------------------------------------------------------------------------------------------------------------------------------------------------------------------------------------------------------------------------------------------------------------|
| <b>Occlusion Spectroscopy (OS) – based on R-NIR scattering / extinction</b> | <ul style="list-style-type: none"> <li>Suitable for the non-invasive measurement of arterial glucose</li> </ul>                                                                                                                                                          | <ul style="list-style-type: none"> <li>Susceptibility to many endovascular variables, such as pharmacological treatment, internal erythrocyte aggregation, free fatty acid concentration and chylomicrons (ULDLs)</li> </ul>                                                                |
| <b>RadioFrequency Sensor Technology (RFST)</b>                              | <ul style="list-style-type: none"> <li>No risk of damaging tissue</li> <li>Fast response</li> </ul>                                                                                                                                                                      | <ul style="list-style-type: none"> <li>Not sensitive nor selective system</li> <li>Susceptible to temperature, pressure and sweat</li> </ul>                                                                                                                                                |
| <b>NanoPhotonics Technology (NPT)</b>                                       | <ul style="list-style-type: none"> <li>Highly sensitive and specific</li> </ul>                                                                                                                                                                                          | <ul style="list-style-type: none"> <li>Sensitive for pH changes and/or oxygen levels</li> <li>Potential toxicity issues due to foreign body in biological media</li> <li>Limitations associated with photostability and loss of recognition capability</li> </ul>                           |
| <b>Urine test strips</b>                                                    | <ul style="list-style-type: none"> <li>Results are quickly displayed</li> </ul>                                                                                                                                                                                          | <ul style="list-style-type: none"> <li>Readings aren't extremely accurate</li> <li>Sample extraction isn't user-friendly</li> <li>Need of privacy for sampling</li> <li>Uncertain correlation between glucose in blood and urine</li> <li>Not adapt to continuous fast measures.</li> </ul> |
| <b>Skin suction blister technique (SCB)</b>                                 | <ul style="list-style-type: none"> <li>Well-tolerated</li> <li>Painless procedure</li> <li>Low infection risk</li> </ul>                                                                                                                                                 | <ul style="list-style-type: none"> <li>Requires an "external" sensor</li> <li>Susceptible to temperature and pressure variations and to the presence of other compounds</li> </ul>                                                                                                          |
| <b>Exhaled Breath Analysis (EBA)</b>                                        | <ul style="list-style-type: none"> <li>Ease of use</li> <li>"Keto Diet" should not have significant impact in terms of accuracy standpoint</li> <li>Good correlation between blood glucose and breath acetone levels</li> <li>Not expensive and quick results</li> </ul> | <ul style="list-style-type: none"> <li>Sensitive to variations of temperature</li> <li>Clear correlation still needs to be established</li> </ul>                                                                                                                                           |

**Supplementary Table 2.** Examples of available, recently-studied, or under-development devices for glycaemia monitoring classified on the basis of the exploited technology.

| Technology       | Device (Company)                                                             | Target          | Comment                                   | Status                                  | Ref                                                                                                                                                                                                                                                           |
|------------------|------------------------------------------------------------------------------|-----------------|-------------------------------------------|-----------------------------------------|---------------------------------------------------------------------------------------------------------------------------------------------------------------------------------------------------------------------------------------------------------------|
| NIR Spectroscopy | Combo Glucometer (Choga Medical, Israel)                                     | Finger          | NI, NCGM. Personalized calibration needed | Available                               | (Segman, 2018; Villena Gonzales et al., 2019; Shang et al., 2022) (URL: <a href="https://www.medicalplasticsnews.com/news/device-for-diabetes-exhibiting-at-medica/">https://www.medicalplasticsnews.com/news/device-for-diabetes-exhibiting-at-medica/</a> ) |
|                  | - (Tech4Life, US)                                                            | Finger          | NI, NCGM                                  | Available (trials in several countries) | (Dixit et al., 2021)                                                                                                                                                                                                                                          |
|                  | Wizmi™ (Wear2b Ltd., Israel)                                                 | Arm wrist       | NI, CGM                                   | Proof of concept                        | (Hadar et al., 2019; Villena Gonzales et al., 2019; Shang et al., 2022)                                                                                                                                                                                       |
|                  | LifeLeaf® (LifePlus, US)                                                     | Arm wrist       | PPG                                       | Under development                       | (Shang et al., 2022) (URL: <a href="https://www.lifeplus.ai">https://www.lifeplus.ai</a> )                                                                                                                                                                    |
|                  | - (Polytechnic University of Catalunya, Catalonia)                           | Finger          | PPG                                       | Under development                       | (Monte-Moreno, 2011; Villena Gonzales et al., 2019)                                                                                                                                                                                                           |
|                  | - (Karunya University, India)                                                | Finger, forearm | PPG                                       | Under development                       | (Villena Gonzales et al., 2019)                                                                                                                                                                                                                               |
|                  | NBM-200G (OrSense Ltd., Israel)                                              | Finger          | NI                                        | Withdrawn                               | (Villena Gonzales et al., 2019) (URL: <a href="http://www.orsense.com/product.php?ID=49">http://www.orsense.com/product.php?ID=49</a> )                                                                                                                       |
|                  | Diasensor 1000 (Biocontrol Technology, US)                                   | Skin            | N/A                                       | Withdrawn                               | (Villena Gonzales et al., 2019)                                                                                                                                                                                                                               |
|                  | HELO Extense (World Global Network, US)                                      | Finger          | NI, NCGM, PPG                             | Never released                          | (Villena Gonzales et al., 2019) (URL: <a href="https://website.worldgn.com/heloextense/">https://website.worldgn.com/heloextense/</a> )                                                                                                                       |
|                  | - (TouchTrack Pro)                                                           | N/A             | N/A                                       | Never released                          | (Villena Gonzales et al., 2019)                                                                                                                                                                                                                               |
|                  | GluControl® GC300 (Samsung Fine Chemicals Co., Ltd. & Arith. Med Gmb. H, US) | N/A             | N/A                                       | Never released                          | (Villena Gonzales et al., 2019)                                                                                                                                                                                                                               |
| MIR Spectroscopy | Diamontech D-Band (DiaMonTech AG, Germany)                                   | Finger          | NI, NCGM                                  | Under development                       | (Shang et al., 2022; DiaMonTech: Non-Invasive Blood Glucose Monitoring.) (URL: <a href="https://www.diamontech.de/home#technology">https://www.diamontech.de/home#technology</a> )                                                                            |
|                  | Diamontech D-Pocket (DiaMonTech AG, Germany)                                 | Finger          | NI, NCGM                                  | Under development                       | (Shang et al., 2022; DiaMonTech: Non-Invasive Blood Glucose Monitoring.) (URL: <a href="https://www.diamontech.de/home#technology">https://www.diamontech.de/home#technology</a> )                                                                            |

| Technology                       | Device (Company)                                                         | Target                  | Comment                                                       | Status                        | Ref                                                                                                                                                                                                                                                                                                 |
|----------------------------------|--------------------------------------------------------------------------|-------------------------|---------------------------------------------------------------|-------------------------------|-----------------------------------------------------------------------------------------------------------------------------------------------------------------------------------------------------------------------------------------------------------------------------------------------------|
|                                  | Diamontech D-Base (DiaMonTech AG, Germany)                               | Arm wrist               | MI, CGM, “photothermal detection”                             | Under development             | (Shang et al., 2022; DiaMonTech: Non-Invasive Blood Glucose Monitoring.) (URL: <a href="https://www.diamontech.de/home#technology">https://www.diamontech.de/home#technology</a> )                                                                                                                  |
|                                  | - (Tohoku University, Japan)                                             | Oral mucosa, Inner lips | Trapezoidal multireflection                                   | Under development             | (Kino et al., 2016; Villena Gonzales et al., 2019)                                                                                                                                                                                                                                                  |
|                                  | - (Swiss Federal Institute of Technology, Switzerland)                   | Forearm                 | Photoacoustic detection, QCLs                                 | Under development             | (Kottmann et al., 2016; Villena Gonzales et al., 2019)                                                                                                                                                                                                                                              |
| Raman Spectroscopy (RS)          | GlucBeam (RSP System A/S, Denmark)                                       | Hand palm               | NI, NCGM, Accuracy affected by time-lag                       | Available (under development) | (Lundsgaard-Nielsen et al., 2018; Villena Gonzales et al., 2019; Shang et al., 2022) (URL: <a href="https://rspsystems.com/glucobeam/">https://rspsystems.com/glucobeam/</a> )                                                                                                                      |
|                                  | C8 Medisensors (C8 Medisensors inc., US)                                 | Skin                    | Needed an additional influx of capital to finalize the design | Never released                | (Villena Gonzales et al., 2019) (URL: <a href="https://www.medgadget.com/2012/10/c8-non-invasive-optical-glucose-monitor-system-cleared-for-sale-in-europe-video.html">https://www.medgadget.com/2012/10/c8-non-invasive-optical-glucose-monitor-system-cleared-for-sale-in-europe-video.html</a> ) |
| Photoacoustic Spectroscopy (PAS) | - (Electronics and Telecomm. Research Inst. of Korea, Republic of Korea) | Fingertip               | NI, NCGM                                                      | Under development             | (Sim et al., 2018; Villena Gonzales et al., 2019)                                                                                                                                                                                                                                                   |
|                                  | Aprise (Glucon, US)                                                      | Upper arm               | NI, CGM                                                       | Never released                | (Villena Gonzales et al., 2019) (URL: <a href="https://www.diabetesincontrol.com/continuous-non-invasive-glucose-monitoring-device-shows-positive-results-in-cl/">https://www.diabetesincontrol.com/continuous-non-invasive-glucose-monitoring-device-shows-positive-results-in-cl/</a> )           |
| Reverse Iontophoresis (RI)       | GluCall (K.M.H Co., Ltd., South Korea)                                   | Arm wrist               | MI, CGM                                                       | Available (Under development) | (Villena Gonzales et al., 2019) (URL: <a href="https://kmholding.en.ec21.com/GluCall_Non-Invasive_Glucose_Monitor-969741_969746.html">https://kmholding.en.ec21.com/GluCall_Non-Invasive_Glucose_Monitor-969741_969746.html</a> )                                                                   |
|                                  | SugarBEAT (Nemauro Medical, United Kingdom)                              | Upper arm               | MI, CGM (daily disposable Sensor and Transmitter)             | Available                     | (Villena Gonzales et al., 2019; Shang et al., 2022) (URL: <a href="https://nemauromedical.com/nmr-info/">https://nemauromedical.com/nmr-info/</a> )                                                                                                                                                 |
|                                  | - (University of Bath, United Kingdom)                                   | Skin                    | MI, CGM graphene-based transdermal platform                   | Under development             | (Lipani et al., 2018; Villena Gonzales et al., 2019)                                                                                                                                                                                                                                                |
|                                  | Glucowatch (Cygnus Inc., US)                                             | Arm wrist               | Reliability problems                                          | Withdrawn                     | (Villena Gonzales et al., 2019; Shang et al., 2022) (URL: <a href="http://www.mendosa.com/glucowatch.htm">http://www.mendosa.com/glucowatch.htm</a> )                                                                                                                                               |

| Technology                             | Device (Company)                                                 | Target    | Comment                               | Status                     | Ref                                                                                                                                                                                                                                                                                                                               |
|----------------------------------------|------------------------------------------------------------------|-----------|---------------------------------------|----------------------------|-----------------------------------------------------------------------------------------------------------------------------------------------------------------------------------------------------------------------------------------------------------------------------------------------------------------------------------|
| Fluorescence                           | Eversense® (Senseonics, US)                                      | Upper arm | MI, CGM Underskin sensor, for 90 days | Available                  | (Villena Gonzales et al., 2019; Jafri et al., 2020; Shang et al., 2022) (URL: <a href="https://global.eversenseddiabetes.com">https://global.eversenseddiabetes.com</a> )                                                                                                                                                         |
|                                        | - (Profusa, Inc., US)                                            | Skin      | MI, CGM, placed under the skin        | Under development          | (Gamsey et al., 2006; Villena Gonzales et al., 2019)                                                                                                                                                                                                                                                                              |
|                                        | DermalAbyss (Massachusetts Institute of Technology, US)          | Skin      | NI, CGM                               | Under development          | (Vega et al., 2017; Villena Gonzales et al., 2019) (URL: <a href="https://www.dezeen.com/2017/06/01/mit-researchers-tattoo-inks-act-health-trackers-design-technology/">https://www.dezeen.com/2017/06/01/mit-researchers-tattoo-inks-act-health-trackers-design-technology/</a> )                                                |
|                                        | - (University of Western Ontario, Canada)                        | Tears     | MI, CGM, FRET                         | Under development          | (Chen et al., 2017; Villena Gonzales et al., 2019)                                                                                                                                                                                                                                                                                |
| Metabolic Heat Conformation (MHC)      | GlucoGenius (ESER Health Care Digital Technology Co Ltd, Taiwan) | Finger    | NI, NCGM                              | Available                  | (Villena Gonzales et al., 2019) (URL: <a href="https://www.computex.biz/eserhealth/default.aspx?ContentTab=Video&amp;vid=166&amp;t=specific">https://www.computex.biz/eserhealth/default.aspx?ContentTab=Video&amp;vid=166&amp;t=specific</a> )                                                                                   |
|                                        | - (Health-Care Computer, Japan)                                  | Finger    | NI, NCGM                              | Under development          | (Okura et al., 2018; Villena Gonzales et al., 2019)                                                                                                                                                                                                                                                                               |
|                                        | G2 Mobile (Eser Digital, India)                                  | Finger    | NI, NCGM                              | Under development          | (Villena Gonzales et al., 2019) (URL: <a href="https://www.desertcart.in/products/148404256-eser-non-invasive-prickless-bloodless-glucose-meter-blood-sugar-test-no-strip-no-needles">https://www.desertcart.in/products/148404256-eser-non-invasive-prickless-bloodless-glucose-meter-blood-sugar-test-no-strip-no-needles</a> ) |
|                                        | - (Hitachi Ltd., Japan)                                          | Finger    | N/A                                   | Never released             | (Villena Gonzales et al., 2019)                                                                                                                                                                                                                                                                                                   |
| Bioimpedance spectroscopy (BS)         | Glucoband (Calisto Medical, Inc., US)                            | Arm wrist | MI, CMG                               | Withdrawn                  | (Villena Gonzales et al., 2019) (URL: <a href="https://www.medgadget.com/2005/06/glucoband.html">https://www.medgadget.com/2005/06/glucoband.html</a> )                                                                                                                                                                           |
|                                        | Pendra (Pendragon Medical Ltd, Switzerland)                      | Arm wrist | Poor accuracy                         | Withdrawn                  | (Villena Gonzales et al., 2019)                                                                                                                                                                                                                                                                                                   |
| Millimetre and Microwave sensing (MMS) | GlucoWise (MediWise, United Kingdom)                             | Hand      | NI, NCGM                              | Available (not for public) | (Villena Gonzales et al., 2019; Shang et al., 2022) (URL: <a href="https://gluco-wise.com">https://gluco-wise.com</a> )                                                                                                                                                                                                           |
|                                        | - (University of Waterloo and Google, US)                        | N/A       | NI                                    | Under development          | (Shaker et al., 2018; Villena Gonzales et al., 2019)                                                                                                                                                                                                                                                                              |
|                                        | - (University of Cardiff, United Kingdom)                        | Abdomen   | NI, Microwave Split-ring resonance    | Under development          | (Choi et al., 2017; Villena Gonzales et al., 2019)                                                                                                                                                                                                                                                                                |
|                                        | - (Caltech University, US)                                       | Ear lobe  | NI, NCGM                              | Under development          | (Villena Gonzales et al., 2019)                                                                                                                                                                                                                                                                                                   |



| Technology                         | Device (Company)                                                       | Target    | Comment                     | Status                                       | Ref                                                                                                                                                                                                                                                                                  |
|------------------------------------|------------------------------------------------------------------------|-----------|-----------------------------|----------------------------------------------|--------------------------------------------------------------------------------------------------------------------------------------------------------------------------------------------------------------------------------------------------------------------------------------|
|                                    | - (University of Erlangen-Nuremberg, Germany)                          | Skin      | NI, NCGM                    | Under development                            | (Villena Gonzales et al., 2019)                                                                                                                                                                                                                                                      |
| Sonophoresis                       | Symphony (Echo Therapeutics, US)                                       | Skin      | MI, CGM                     | Under development                            | (Villena Gonzales et al., 2019) (URL: <a href="https://www.huffpost.com/entry/glucose-monitoring_b_1503881">https://www.huffpost.com/entry/glucose-monitoring_b_1503881</a> )                                                                                                        |
| Enzymatic detection                | Guardian Sensor 3 (Medtronic Plc., US)                                 | Abdomen   | MI, NCGM                    | Available                                    | (Cappon et al., 2017; Christiansen et al., 2017; Lee et al., 2021; Shang et al., 2022) (URL: <a href="https://news.medtronic.com/MiniMed-R-670G-Hybrid-Closed-Loop-System">https://news.medtronic.com/MiniMed-R-670G-Hybrid-Closed-Loop-System</a> )                                 |
|                                    | Dexcom G6 (DexCom, Inc., US)                                           | Abdomen   | MI, NCGM                    | Available                                    | (Cappon et al., 2017; Boscari et al., 2021, 2022; Lee et al., 2021; Shang et al., 2022) (URL: <a href="https://www.dexcom.com">https://www.dexcom.com</a> )                                                                                                                          |
|                                    | Free Style Libre (Abbott Ltd., US)                                     | Upper arm | MI, NCGM                    | Available                                    | (Cappon et al., 2017; Blum, 2018; Galindo et al., 2020; Jafri et al., 2020; Lee et al., 2021; Shang et al., 2022) (URL: <a href="https://www.medicaldevice-network.com/projects/freestyle-libre/">https://www.medicaldevice-network.com/projects/freestyle-libre/</a> )              |
|                                    | K'Watch (PKvitality, France)                                           | Arm wrist | MI, CGM<br>Skin patch       | Available (under development)                | (Villena Gonzales et al., 2019; Shang et al., 2022) (URL: <a href="https://www.pkvitality.com">https://www.pkvitality.com</a> )                                                                                                                                                      |
|                                    | - (Ulsan National Inst. of Science and Technology, South Korea)        | Tears     | MI, CGM                     | Only research paper                          | (Park et al., 2018; Villena Gonzales et al., 2019)                                                                                                                                                                                                                                   |
|                                    | The biosensor platform (The IQ Global Group Ltd., Australia)           | Saliva    | MI, CGM, Organic Transistor | Under development                            | (Galindo et al., 2020) (URL: <a href="https://www.medicaldesignandoutsourcing.com/harvards-wyss-institute-wants-to-create-a-covid-19-antibody-test-strip/">https://www.medicaldesignandoutsourcing.com/harvards-wyss-institute-wants-to-create-a-covid-19-antibody-test-strip/</a> ) |
|                                    | Mouthguard glucose sensor (Tokyo Medical and Dental University, Japan) | Saliva    | MI, CGM                     | Only research paper                          | (Arakawa et al., 2020)                                                                                                                                                                                                                                                               |
|                                    | NovioSense (Novio Tech Campus, Netherlands)                            | Tears     | MI, CGM                     | Under development (Only for type 1 diabetes) | (Kownacka et al., 2018; Shang et al., 2022)                                                                                                                                                                                                                                          |
|                                    | - (KTH Royal Inst. of Technology, Sweden)                              | Forearm   | MI, CGM                     | Under development                            | (Ribet et al., 2018; Villena Gonzales et al., 2019)                                                                                                                                                                                                                                  |
| Optical Coherence Tomography (OCT) | - (National Cheng Kung University, Taiwan)                             | Fingertip | NI, NCGM                    | Under development                            | (Chen et al., 2018; Villena Gonzales et al., 2019)                                                                                                                                                                                                                                   |

| Technology                                                             | Device (Company)                                           | Target    | Comment                                            | Status                              | Ref                                                                                                                                                                                                                                                                                                  |
|------------------------------------------------------------------------|------------------------------------------------------------|-----------|----------------------------------------------------|-------------------------------------|------------------------------------------------------------------------------------------------------------------------------------------------------------------------------------------------------------------------------------------------------------------------------------------------------|
| Combination of:<br>•Ultrasound<br>•Thermal<br>•Electromagnetic sensing | Glucotrack (Integrity Applications, Israel)                | Ear lobe  | NI, NCGM individually calibrated Personal Ear Clip | Available (Not for type 1 diabetes) | (Harman-Boehm et al., 2010; Villena Gonzales et al., 2019; Shang et al., 2022) (URL: <a href="https://www.techyv.com/tips/top-10-highly-useful-techs-for-checking-blood-glucose-level/">https://www.techyv.com/tips/top-10-highly-useful-techs-for-checking-blood-glucose-level/</a> )               |
|                                                                        | Egm1000™ (Evia Medical Technologies Limited, Saudi Arabia) | Ear lobe  | NI, NCGM individually calibrated Personal Ear Clip | Available (Not for type 1 diabetes) | (Mosli and Madani, 2021) (URL: <a href="https://pharmatee.com/product/egm-1000/">https://pharmatee.com/product/egm-1000/</a> )                                                                                                                                                                       |
| Radio Frequency Sensor Technology (RFST)                               | Alertgy® (Alertgy Ltd., US)                                | Arm wrist | NI, CGM                                            | Under development                   | (Meet Alertgy® NICGM. Blood Glucose Monitoring) (URL: <a href="https://www.alertgy.com/technology/">https://www.alertgy.com/technology/</a> )                                                                                                                                                        |
|                                                                        | UBAND™ (Know Labs, US)                                     | Arm wrist | NI, CGM, Bio-RFID                                  | Under development                   | (Shang et al., 2022; UBAND-Know Labs. Bio-RFID™) (URL: <a href="https://www.businesswire.com/news/home/20191121005261/en/Know-Labs-Unveils-New-UBAND-Design-and-Smartphone-App">https://www.businesswire.com/news/home/20191121005261/en/Know-Labs-Unveils-New-UBAND-Design-and-Smartphone-App</a> ) |
| NanoPhotonic Technology (NPT)                                          | Indigo Diabetes (INDIGO DIABETES N.V., Belgium)            | Skin      | MI, CGM, placed under the skin                     | Proof of concept                    | (INDIGO Giving people with diabetes the extra sense for health) (URL: <a href="https://indigomed.com/product/">https://indigomed.com/product/</a> )                                                                                                                                                  |

Ref: Reference(s); MI: Minimally invasive, NI: Non-invasive, NCGM: Non continuous glucose monitoring, CGM: Continuous glucose monitoring, QCL: Quantum Cascade lasers, PPG: Photoplethysmography. Bio-RFID: Body Radio Frequency Identification. FRET: Fluorescence Resonance Energy Transfer. PEG: Parkes Error Grid, EGA: Clarke Error Grid, N/A: not available.

## References

- Arakawa, T., Tomoto, K., Nitta, H., Toma, K., Takeuchi, S., Sekita, T., et al. (2020). A Wearable Cellulose Acetate-Coated Mouthguard Biosensor for In Vivo Salivary Glucose Measurement. *Anal. Chem.* 92, 12201–12207. doi: 10.1021/acs.analchem.0c01201.
- Blum, A. (2018). Freestyle Libre Glucose Monitoring System. *Clin. Diabetes* 36, 203–204. doi: 10.2337/cd17-0130.
- Boscari, F., Vettoretti, M., Amato, A. M. L., Vallone, V., Uliana, A., Iori, E., et al. (2021). Comparing the accuracy of transcutaneous sensor and 90-day implantable glucose sensor. *Nutr. Metab. Cardiovasc. Dis.* 31, 650–657. doi: 10.1016/j.numecd.2020.09.006.
- Boscari, F., Vettoretti, M., Cavallin, F., Amato, A. M. L., Uliana, A., Vallone, V., et al. (2022). Implantable and transcutaneous continuous glucose monitoring system: a randomized cross over trial comparing accuracy, efficacy and acceptance. *J. Endocrinol. Invest.* 45, 115–124. doi: 10.1007/s40618-021-01624-2.
- Cappon, G., Acciaroli, G., Vettoretti, M., Facchinetti, A., and Sparacino, G. (2017). Wearable Continuous Glucose Monitoring Sensors: A Revolution in Diabetes Treatment. *Electronics* 6, 65. doi: 10.3390/electronics6030065.

- Chen, L., Tse, W. H., Chen, Y., McDonald, M. W., Melling, J., and Zhang, J. (2017). Nanostructured biosensor for detecting glucose in tear by applying fluorescence resonance energy transfer quenching mechanism. *Biosens. Bioelectron.* 91, 393–399. doi: 10.1016/j.bios.2016.12.044.
- Chen, T.-L., Lo, Y.-L., Liao, C.-C., and Phan, Q.-H. (2018). Noninvasive measurement of glucose concentration on human fingertip by optical coherence tomography. *J. Biomed. Opt.* 23, 1. doi: 10.1117/1.JBO.23.4.047001.
- Choi, H., Luzio, S., Beutler, J., and Porch, A. (2017). Microwave noninvasive blood glucose monitoring sensor: Human clinical trial results. in *2017 IEEE MTT-S International Microwave Symposium (IMS)* (Honolulu, HI, USA: IEEE), 876–879. doi: 10.1109/MWSYM.2017.8058721.
- Christiansen, M. P., Garg, S. K., Brazg, R., Bode, B. W., Bailey, T. S., Slover, R. H., et al. (2017). Accuracy of a Fourth-Generation Subcutaneous Continuous Glucose Sensor. *Diabetes Technol. Ther.* 19, 446–456. doi: 10.1089/dia.2017.0087.
- DiaMonTech: Non-Invasive Blood Glucose Monitoring. Available at: <https://www.diamontech.de/home>.
- Dixit, K., Fardindoost, S., Ravishankara, A., Tasnim, N., and Hoorfar, M. (2021). Exhaled Breath Analysis for Diabetes Diagnosis and Monitoring: Relevance, Challenges and Possibilities. *Biosensors* 11, 476. doi: 10.3390/bios11120476.
- Galindo, R. J., Migdal, A. L., Davis, G. M., Urrutia, M. A., Albury, B., Zambrano, C., et al. (2020). Comparison of the FreeStyle Libre Pro Flash Continuous Glucose Monitoring (CGM) System and Point-of-Care Capillary Glucose Testing in Hospitalized Patients With Type 2 Diabetes Treated With Basal-Bolus Insulin Regimen. *Diabetes Care* 43, 2730–2735. doi: 10.2337/dc19-2073.
- Gamsey, S., Suri, J. T., Wessling, R. A., and Singaram, B. (2006). Continuous Glucose Detection Using Boronic Acid-Substituted Viologens in Fluorescent Hydrogels: Linker Effects and Extension to Fiber Optics. *Langmuir* 22, 9067–9074. doi: 10.1021/la0617053.
- Hadar, E., Chen, R., Toledano, Y., Tenenbaum-Gavish, K., Atzmon, Y., and Hod, M. (2019). Noninvasive, continuous, real-time glucose measurements compared to reference laboratory venous plasma glucose values. *J. Matern. Fetal Neonatal Med.* 32, 3393–3400. doi: 10.1080/14767058.2018.1463987.
- Harman-Boehm, I., Gal, A., Raykhman, A. M., Naidis, E., and Mayzel, Y. (2010). Noninvasive Glucose Monitoring: Increasing Accuracy by Combination of Multi-Technology and Multi-Sensors. *J. Diabetes Sci. Technol.* 4, 583–595. doi: 10.1177/193229681000400312.
- INDIGO Giving people with diabetes the extra sense for health Available at: <https://indigomed.com>.
- Jafri, R. Z., Balliro, C. A., El-Khatib, F., Maheno, M. M., Hillard, M. A., O'Donovan, A., et al. (2020). A Three-Way Accuracy Comparison of the Dexcom G5, Abbott Freestyle Libre Pro, and Senseonics Eversense Continuous Glucose Monitoring Devices in a Home-Use Study of Subjects with Type 1 Diabetes. *Diabetes Technol. Ther.* 22, 846–852. doi: 10.1089/dia.2019.0449.

- Kino, S., Omori, S., Katagiri, T., and Matsuura, Y. (2016). Hollow optical-fiber based infrared spectroscopy for measurement of blood glucose level by using multi-reflection prism. *Biomed. Opt. Express* 7, 701. doi: 10.1364/BOE.7.000701.
- Kottmann, J., Rey, J., and Sigrist, M. (2016). Mid-Infrared Photoacoustic Detection of Glucose in Human Skin: Towards Non-Invasive Diagnostics. *Sensors* 16, 1663. doi: 10.3390/s16101663.
- Kownacka, A. E., Vegelyte, D., Joosse, M., Anton, N., Toebes, B. J., Lauko, J., et al. (2018). Clinical Evidence for Use of a Noninvasive Biosensor for Tear Glucose as an Alternative to Painful Finger-Prick for Diabetes Management Utilizing a Biopolymer Coating. *Biomacromolecules* 19, 4504–4511. doi: 10.1021/acs.biomac.8b01429.
- Lee, I., Probst, D., Klonoff, D., and Sode, K. (2021). Continuous glucose monitoring systems - Current status and future perspectives of the flagship technologies in biosensor research -. *Biosens. Bioelectron.* 181, 113054. doi: 10.1016/j.bios.2021.113054.
- Lipani, L., Dupont, B. G. R., Doungmene, F., Marken, F., Tyrrell, R. M., Guy, R. H., et al. (2018). Non-invasive, transdermal, path-selective and specific glucose monitoring via a graphene-based platform. *Nat. Nanotechnol.* 13, 504–511. doi: 10.1038/s41565-018-0112-4.
- Lundsgaard-Nielsen, S. M., Pors, A., Banke, S. O., Henriksen, J. E., Hepp, D. K., and Weber, A. (2018). Critical-depth Raman spectroscopy enables home-use non-invasive glucose monitoring. *PLOS ONE* 13, e0197134. doi: 10.1371/journal.pone.0197134.
- Meet Alertgy® NICGM. Blood Glucose Monitoring. In The Convenience of a Wristband. For Diabetics. For Healthcare. Using Non-invasive Deep-Gluco® Available at: <https://www.alertgy.com>.
- Monte-Moreno, E. (2011). Non-invasive estimate of blood glucose and blood pressure from a photoplethysmograph by means of machine learning techniques. *Artif. Intell. Med.* 53, 127–138. doi: 10.1016/j.artmed.2011.05.001.
- Mosli, H. H., and Madani, B. M. (2021). Performance evaluation of egm1000™ non-invasive glucose monitoring device in patients with type 2 diabetes and subjects with prediabetes. *Int. J. Med. Dev. Ctries.* 5(4), 9. doi: 10.24911/IJMDC.51-1611360395.
- Okura, T., Teramoto, K., Koshitani, R., Fujioka, Y., Endo, Y., Ueki, M., et al. (2018). A Computer-Based Glucose Management System Reduces the Incidence of Forgotten Glucose Measurements: A Retrospective Observational Study. *Diabetes Ther.* 9, 1143–1147. doi: 10.1007/s13300-018-0427-z.
- Park, J., Kim, J., Kim, S.-Y., Cheong, W. H., Jang, J., Park, Y.-G., et al. (2018). Soft, smart contact lenses with integrations of wireless circuits, glucose sensors, and displays. *Sci. Adv.* 4, eaap9841. doi: 10.1126/sciadv.aap9841.
- Ribet, F., Stemme, G., and Roxhed, N. (2018). Real-time intradermal continuous glucose monitoring using a minimally invasive microneedle-based system. *Biomed. Microdevices* 20, 101. doi: 10.1007/s10544-018-0349-6.

- Segman, Y. (Joseph) (2018). Device and Method for Noninvasive Glucose Assessment. *J. Diabetes Sci. Technol.* 12, 1159–1168. doi: 10.1177/1932296818763457.
- Shaker, G., Smith, K., Omer, A. E., Liu, S., Csech, C., Wadhwa, U., et al. (2018). Non-Invasive Monitoring of Glucose Level Changes Utilizing a mm-Wave Radar System: *Int. J. Mob. Hum. Comput. Interact.* 10, 10–29. doi: 10.4018/IJMHCI.2018070102.
- Shang, T., Zhang, J. Y., Thomas, A., Arnold, M. A., Vetter, B. N., Heinemann, L., et al. (2022). Products for Monitoring Glucose Levels in the Human Body With Noninvasive Optical, Noninvasive Fluid Sampling, or Minimally Invasive Technologies. *J. Diabetes Sci. Technol.* 16, 168–214. doi: 10.1177/19322968211007212.
- Sim, J. Y., Ahn, C.-G., Jeong, E.-J., and Kim, B. K. (2018). In vivo Microscopic Photoacoustic Spectroscopy for Non-Invasive Glucose Monitoring Invulnerable to Skin Secretion Products. *Sci. Rep.* 8, 1059. doi: 10.1038/s41598-018-19340-y.
- UBAND-Know Labs. Bio-RFID™. Transforming Non-Invasive Medical Diagnostics Available at: <https://www.knowlabs.co>.
- Vega, K., Jiang, N., Liu, X., Kan, V., Barry, N., Maes, P., et al. (2017). The dermal abyss: interfacing with the skin by tattooing biosensors. in *Proceedings of the 2017 ACM International Symposium on Wearable Computers* (Maui Hawaii: ACM), 138–145. doi: 10.1145/3123021.3123039.
- Villena Gonzales, W., Mobashsher, A., and Abbosh, A. (2019). The Progress of Glucose Monitoring—A Review of Invasive to Minimally and Non-Invasive Techniques, Devices and Sensors. *Sensors* 19, 800. doi: 10.3390/s19040800.
